# Supplementary material for: Risk‐Standardizing Rates of Return of Spontaneous Circulation for In‐Hospital Cardiac Arrest to Facilitate Hospital Comparisons
Source: PubMed Central journal article supplement — J Am Heart Assoc. 2020 Mar 21;9(7):e014837. doi: 10.1161/JAHA.119.014837 (PMC7428602; doi:10.1161/jaha.119.014837), 2020-03-21
Supplement: JAH3-9-e014837-s001.pdf [file JAH3-9-e014837-s001.pdf]

# **Supplemental Material**

**American Heart Association Get With the Guidelines – Resuscitation (formerly National Registry of Cardiopulmonary Resuscitation) Investigators:**

Besides the authors Paul S. Chan, MD, MSc, members of the Get With The Guidelines-Resuscitation Clinical Work Group and Adult Task Force include:

Anne Grossestreuer PhD, Beth Israel Deaconess Medical Center

Ari Moskowitz MD, Harvard Medical School

Dana Edelson MD MS, University of Chicago Medicine

Joseph Ornato MD, Virginia Commonwealth University Health System

Katherine Berg MD, Beth Israel Deaconess Medical Center/Harvard Medical School

Mary Ann Peberdy MD, Virginia Commonwealth University Medical Center

Matthew Churpek MD MPH PhD, University of Chicago Medicine

Michael Kurz MD MS-HES, University of Alabama school of Medicine

Monique Anderson Starks MD MHS, Duke University School of Medicine

Saket Girotra MBBS SM, University of Iowa Carver College of Medicine

Sarah Perman MD MSCE, University of Colorado School of Medicine

Zachary Goldberger MD MS, University of Washington School of Medicine

**Table S1. Patient characteristics by ROSC status.**

|                                   | <b>ROSC</b><br><b>(n = 59,754)</b> | <b>Died</b><br><b>(n = 22,975)</b> | <b>P Value</b> |
|-----------------------------------|------------------------------------|------------------------------------|----------------|
| <i>Demographics</i>               |                                    |                                    |                |
| Age, Mean $\pm$ SD                | 64.7 $\pm$ 15.4                    | 66.6 $\pm$ 15.9                    | <0.001         |
| Age                               |                                    |                                    | < 0.001        |
| 18 to <50                         | 9124 (15.3%)                       | 3176 (13.8%)                       |                |
| 50 to 59                          | 10626 (17.8%)                      | 3534 (15.4%)                       |                |
| 60 to 69                          | 15566 (26.1%)                      | 5540 (24.1%)                       |                |
| 70 to 79                          | 14289 (23.9%)                      | 5536 (24.1%)                       |                |
| 80 to 89                          | 10149 (17.0%)                      | 5189 (22.6%)                       |                |
| $\geq$ 90                         |                                    |                                    |                |
| Male sex                          | 34,804 (58.3%)                     | 13,604 (59.2%)                     | 0.01           |
| Race                              |                                    |                                    | 0.01           |
| White                             | 40,497 (67.8%)                     | 15,543 (67.7%)                     |                |
| Black                             | 13,766 (23.0%)                     | 5174 (22.5%)                       |                |
| Other                             | 1438 (2.4%)                        | 558 (2.4%)                         |                |
| Unknown                           | 4053 (6.8%)                        | 1700 (7.4%)                        |                |
| <i>Characteristics of arrest</i>  |                                    |                                    |                |
| Cardiac arrest rhythm             |                                    |                                    | < 0.001        |
| Asystole                          | 14,476 (24.2%)                     | 7228 (31.5%)                       |                |
| Pulseless electrical activity     | 33,788 (56.5%)                     | 13,110 (57.1%)                     |                |
| Ventricular fibrillation          | 6382 (10.7%)                       | 1536 (6.7%)                        |                |
| Pulseless ventricular tachycardia | 5108 (8.5%)                        | 1101 (4.8%)                        |                |
| Hospital Location                 |                                    |                                    | < 0.001        |
| Intensive care unit               | 29,210 (48.9%)                     | 11,170 (48.6%)                     |                |
| Monitored unit                    | 9328 (15.6%)                       | 3122 (13.6%)                       |                |
| Non-Monitored unit                | 8206 (13.7%)                       | 4081 (17.8%)                       |                |
| Emergency room                    | 6979 (11.7%)                       | 2772 (12.1%)                       |                |

|                                      |                |                |         |
|--------------------------------------|----------------|----------------|---------|
| Procedural or surgical area          | 5012 (8.4%)    | 1393 (6.1%)    |         |
| Other                                | 1019 (1.7%)    | 437 (1.9%)     |         |
| <i>Pre-Existing Conditions</i>       |                |                |         |
| Respiratory insufficiency            | 28,470 (47.6%) | 10,236 (44.6%) | <0.001  |
| Renal insufficiency                  | 22,041 (36.9%) | 8026 (34.9%)   | <0.001  |
| Diabetes mellitus                    | 21,162 (35.4%) | 7168 (31.2%)   | <0.001  |
| Hypotension                          | 15,818 (26.5%) | 6016 (26.2%)   | 0.40    |
| Heart failure this admission         | 9153 (15.3%)   | 3069 (13.4%)   | <0.001  |
| Prior heart failure                  | 13,533 (22.6%) | 4938 (21.5%)   | <0.001  |
| Myocardial infarction this admission | 8763 (14.7%)   | 3082 (13.4%)   | <0.001  |
| Prior myocardial infarction          | 8212 (13.7%)   | 3024 (13.2%)   | 0.03    |
| Metabolic or electrolyte abnormality | 14,355 (24.0%) | 4972 (21.6%)   | <0.001  |
| Sepsis                               | 11,272 (18.9%) | 4278 (18.6%)   | 0.42    |
| Pneumonia                            | 8611 (14.4%)   | 3127 (13.6%)   | 0.003   |
| Metastatic or hematologic malignancy | 6135 (10.3%)   | 2759 (12.0%)   | <0.001  |
| Hepatic insufficiency                | 5004 (8.4%)    | 1773 (7.7%)    | 0.002   |
| Baseline depression in CNS function  | 4437 (7.4%)    | 1602 (7.0%)    | 0.02    |
| Acute CNS non-stroke event           | 4513 (7.6%)    | 1440 (6.3%)    | <0.001  |
| Acute stroke                         | 2366 (4.0%)    | 949 (4.1%)     | 0.26    |
| Major trauma                         | 2803 (4.7%)    | 1173 (5.1%)    | 0.01    |
| <i>Interventions in Place</i>        |                |                |         |
| Mechanical ventilation               | 14,351 (24.0%) | 5744 (25.0%)   | 0.003   |
| Continuous intravenous vasopressor   | 13,707 (22.9%) | 6142 (26.7%)   | < 0.001 |
| Dialysis                             | 1674 (2.8%)    | 598 (2.6%)     | 0.12    |

---

CNS, central nervous system; SD, standard deviation

**Table S2. Definitions of Select Variables in Models.**

**Myocardial infarction** -- Documented diagnosis of acute coronary syndrome or myocardial infarction.

**Heart failure** -- Documented diagnosis of congestive heart failure.

**Renal insufficiency** – Evidence for any of the following within 24 hours of cardiac arrest:

- Requirement for ongoing dialysis or extracorporeal filtration therapies.
- Serum creatinine > 2 mg/dL

**Hepatic insufficiency** – Evidence for any of the following within 24 hours of cardiac arrest:

- Total bilirubin > 2 mg/dL and AST > 2x normal
- Cirrhosis

**Hypotension** – Evidence for any of the following within 24 hours of cardiac arrest:

- SBP < 90 or MAP < 60 mmHg.
- Vasopressor/inotropic requirement after volume expansion (except for dopamine  $\leq$  3 mcg/kg/min).
- Intra-aortic balloon pump

**Septicemia** -- Documented bloodstream infection where antibiotics have not yet been started or the infection is still being treated with antibiotics.

**Acute stroke** -- Documented diagnosis of an intracranial/intraventricular hemorrhage or thrombosis during the index admission prior to cardiac arrest.

**Diabetes mellitus** -- Documented diagnosis of either Type I or Type II diabetes mellitus.

**Metabolic / electrolyte abnormality** -- Evidence for any of the following within 24 hours of cardiac arrest:

- Sodium < 125 or > 150 mEq/L
- Potassium < 2.5 or > 6 mEq/L
- pH < 7.3 or > 7.5, arterial
- Lactate > 2.5 mmol/L,
- Blood glucose < 60 mg/dL

**Metastatic or hematologic malignancy** – Documentation of any solid tissue malignancy with evidence of metastasis, or any blood borne malignancy.

**Major trauma** -- Evidence of multi-system injury or single system injury associated with shock or altered mental status during the index hospitalization prior to cardiac arrest.

**Mechanical ventilation** – Requirement for assisted ventilation via an endotracheal tube or tracheostomy within 24 hours of cardiac arrest.

**Dialysis** – Requirement for hemodialysis, peritoneal dialysis, or continuous arteriovenous or veno-venous hemofiltration/dialysis prior to the time of the cardiac arrest

**Continuous intravenous vasopressor** -- Continuous intravenous infusion of at least one of the following vasoactive agents at the time of cardiac arrest:

- Dobutamine
- Dopamine > 3 mcg/kg/min
- Epinephrine
- Norepinephrine
- Phenylephrine
- Other Vasoactive Agent

**Figure S1. Calibration Plot of Reduced ROSC Model in Validation Cohort.**

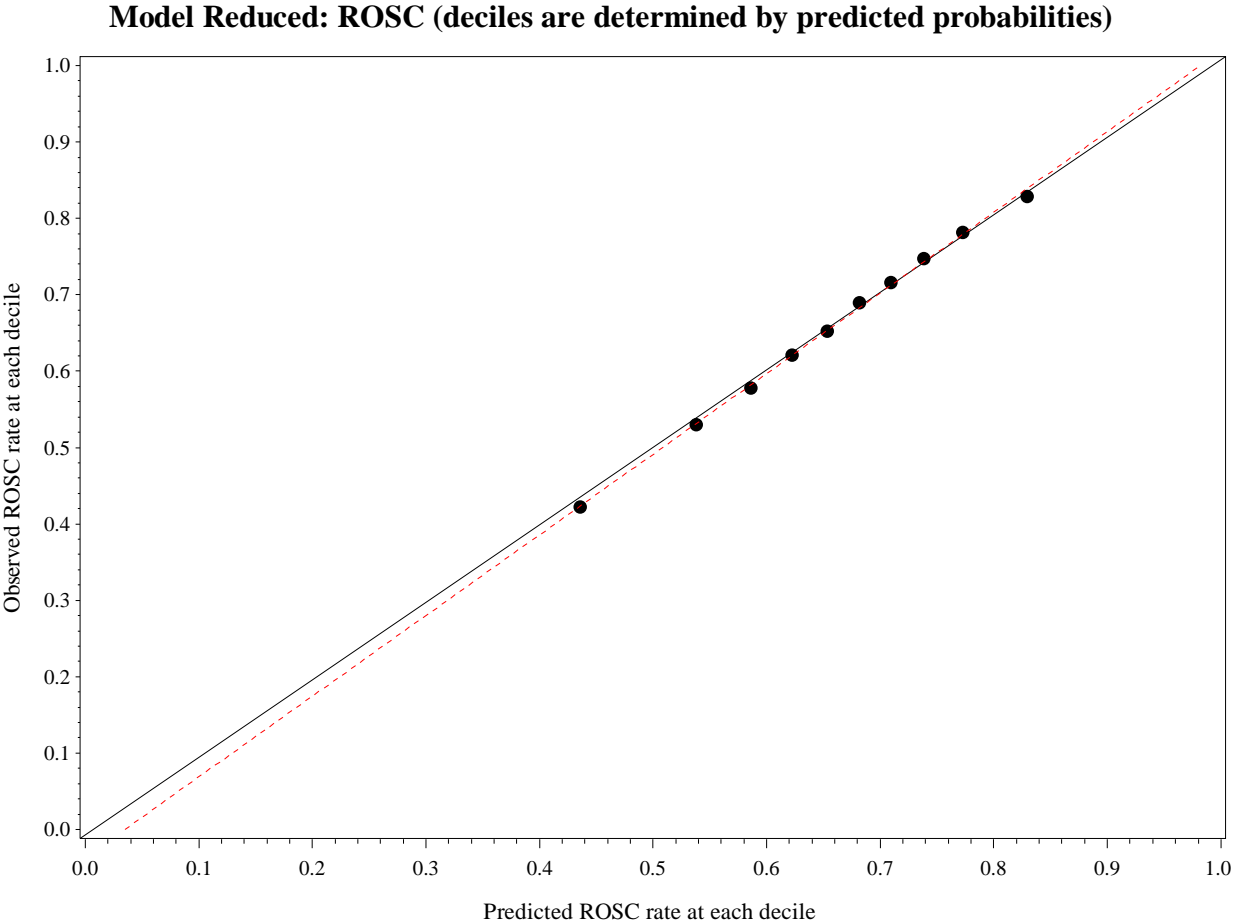

Model had an  $R^2$  of 0.99, suggesting excellent fit in the validation cohort.
